# Supplementary material
Source: MDPI journal article supplement (https://www.mdpi.com/2227-9717/10/4/647)
Supplement: s1 [file s1]

Table S1: Summary of quantitative analysis of (E)-resveratrol content at each step of the purification process

| Soxhlet extract in diethyl ether<br>after NaHCO <sub>3</sub> washing |                                             | Soxhlet extract after NaHCO <sub>3</sub><br>washing and Sephadex column<br>chromatography |                                             | Soxhlet extract after NaHCO <sub>3</sub><br>washing, Sephadex LH-20, and<br>RP-Silica column<br>chromatography |                                             |
|----------------------------------------------------------------------|---------------------------------------------|-------------------------------------------------------------------------------------------|---------------------------------------------|----------------------------------------------------------------------------------------------------------------|---------------------------------------------|
| Trial                                                                | Avarage A <sub>Resv</sub> / A <sub>ES</sub> | Trial                                                                                     | Avarage A <sub>Resv</sub> / A <sub>ES</sub> | Trial                                                                                                          | Avarage A <sub>Resv</sub> / A <sub>ES</sub> |
| 1                                                                    | 1.0193                                      | 1                                                                                         | 0.9828                                      | 1                                                                                                              | 0.8454                                      |
| 2                                                                    | 1.0186                                      | 2                                                                                         | 0.9800                                      | 2                                                                                                              | 0.8426                                      |
| 3                                                                    | 1.0155                                      | 3                                                                                         | 0.9701                                      | 3                                                                                                              | 0.8883                                      |
| (E)-resveratrol 332.9 ± 0.4 µg/g                                     |                                             | (E)-resveratrol 319.6 ± 1.3 µg/g                                                          |                                             | (E)-resveratrol 279.9 ± 4.9 µg/g                                                                               |                                             |

### Calibration curve

ES: 4-Phenylphenol 1400µg/mL solution  
Data analysis height reject: 100units

Amount: 100µL per 1mL sample  
Baseline at valleys: ON

| sample<br>no. | [Resveratrol]<br>µg/ml | Area under the curve |         |         |         |         |         | Ratio between Area for Resv. and ES |          |          | Avarage  |
|---------------|------------------------|----------------------|---------|---------|---------|---------|---------|-------------------------------------|----------|----------|----------|
|               |                        | Run 1                |         | Run 2   |         | Run 3   |         | Run 1                               | Run 2    | Run 3    |          |
|               |                        | Resv.                | ES      | Resv.   | ES      | Resv.   | ES      |                                     |          |          |          |
| 1             | 200                    | 37632.4              | 22480   | 37611.3 | 22461.6 | 37237.6 | 22127.5 | 1.674039                            | 1.674471 | 1.682865 | 1.677125 |
| 2             | 100                    | 19711.3              | 22207.1 | 19693   | 22191.6 | 19579.9 | 22076.2 | 0.887613                            | 0.887408 | 0.886923 | 0.887315 |
| 3             | 50                     | 10007.1              | 22537.1 | 9998.9  | 22532.5 | 9994.8  | 22528.1 | 0.444028                            | 0.443755 | 0.443659 | 0.443814 |
| 4             | 25                     | 4959.6               | 22437.1 | 4891.6  | 22133.4 | 4949.1  | 22397.2 | 0.221045                            | 0.221005 | 0.22097  | 0.221007 |
| 5             | 12.5                   | 2411.4               | 21724.1 | 2442.1  | 22771.4 | 2441.9  | 22780   | 0.111001                            | 0.107244 | 0.107195 | 0.10848  |

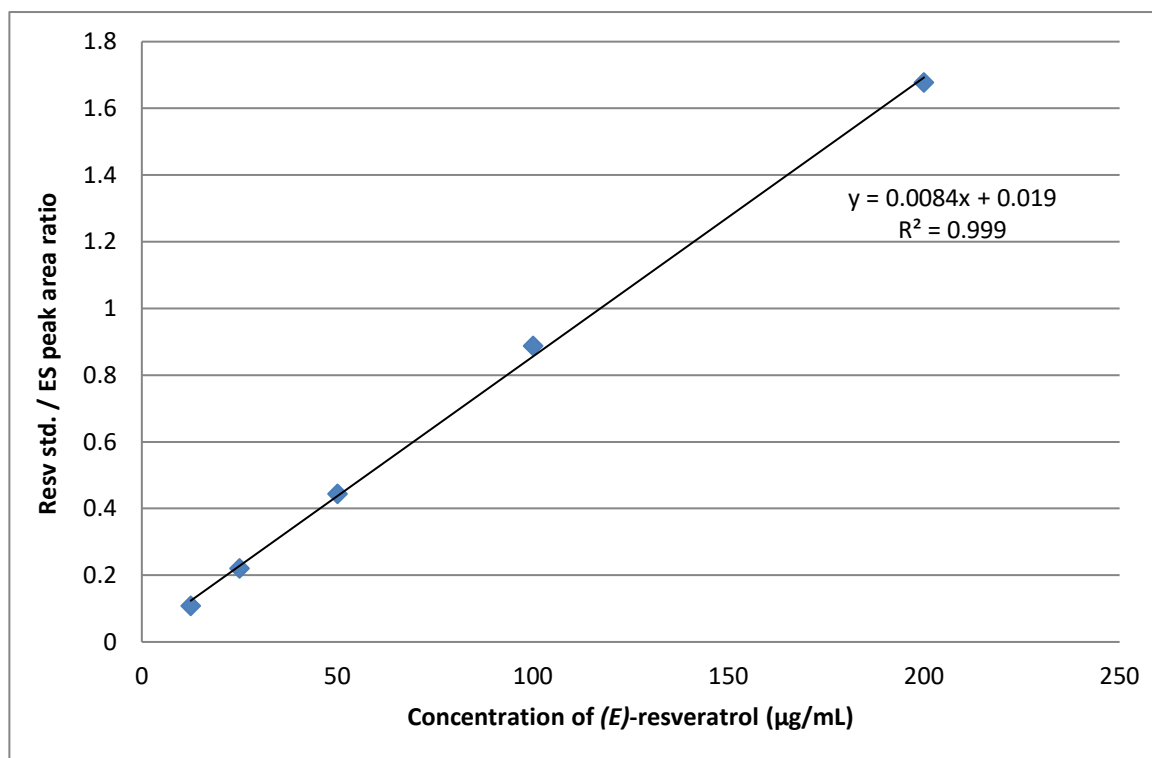

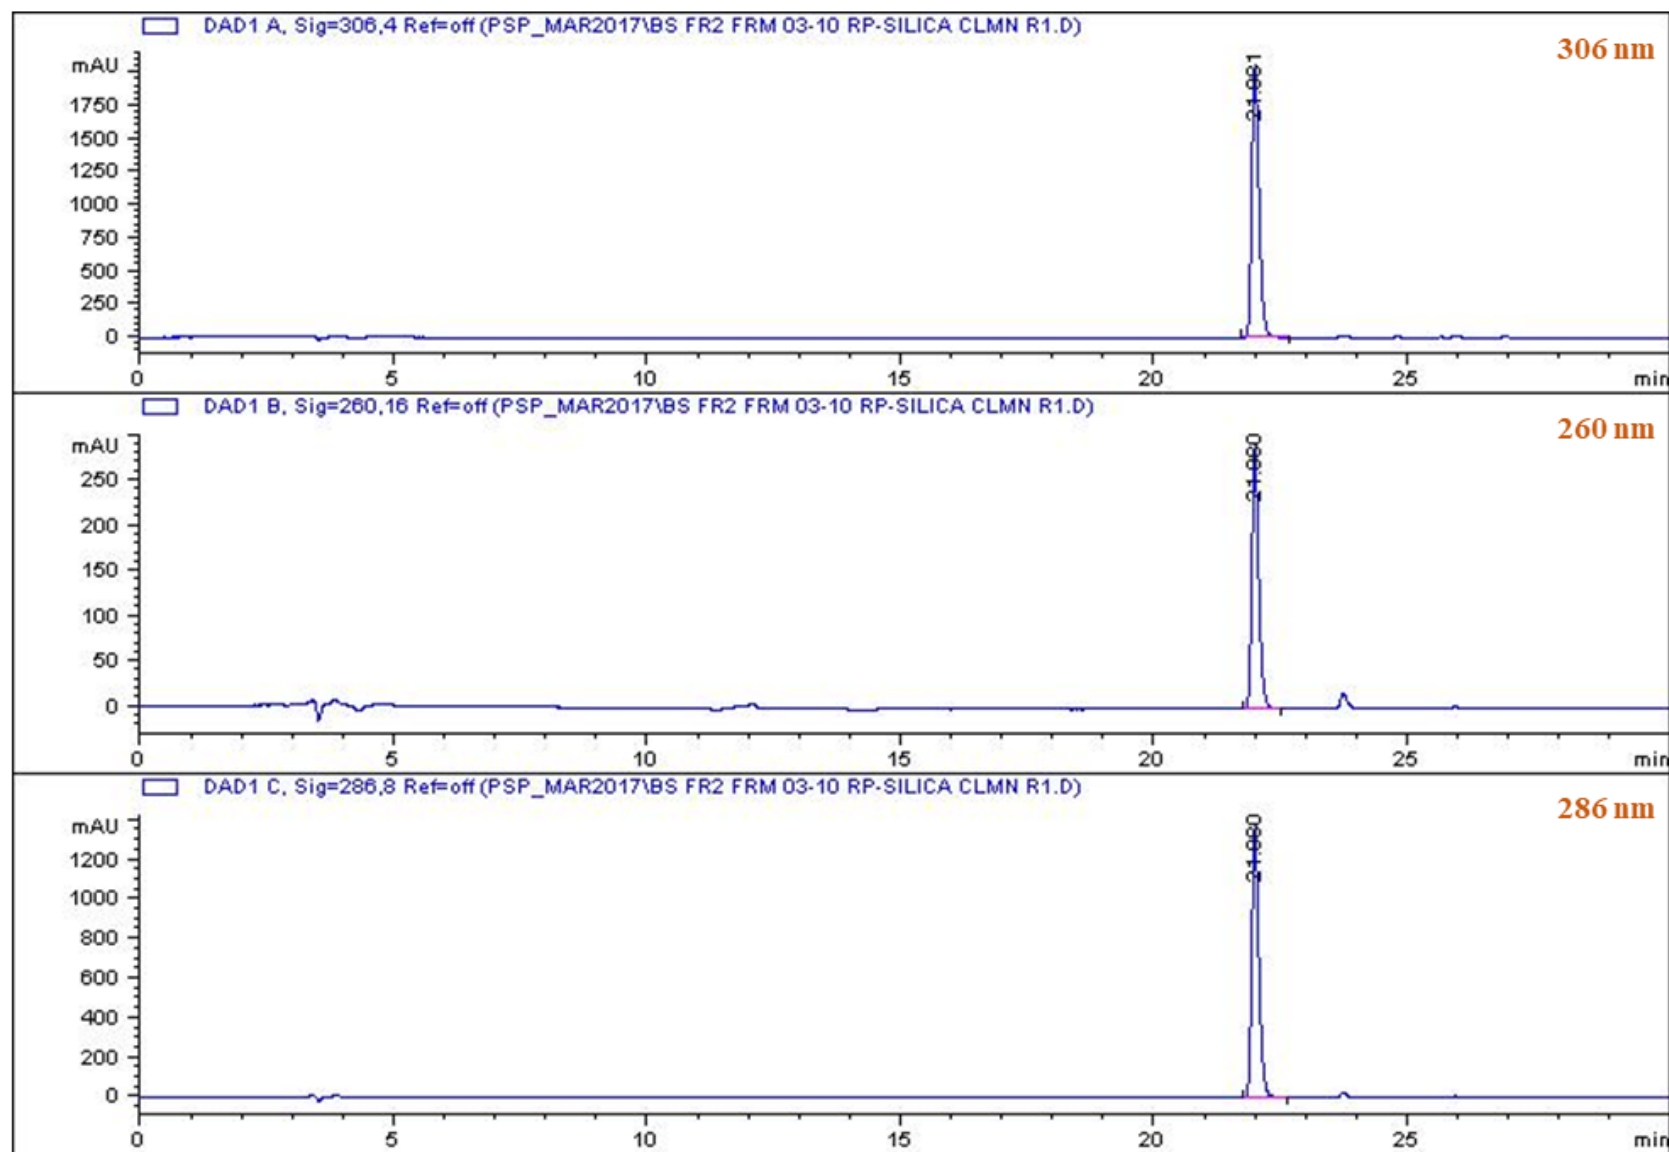

Figure S1: Final purified product HPLC chromatograms at common detector wavelengths (306 nm, 260 nm, and 286 nm) for polyphenolic compounds

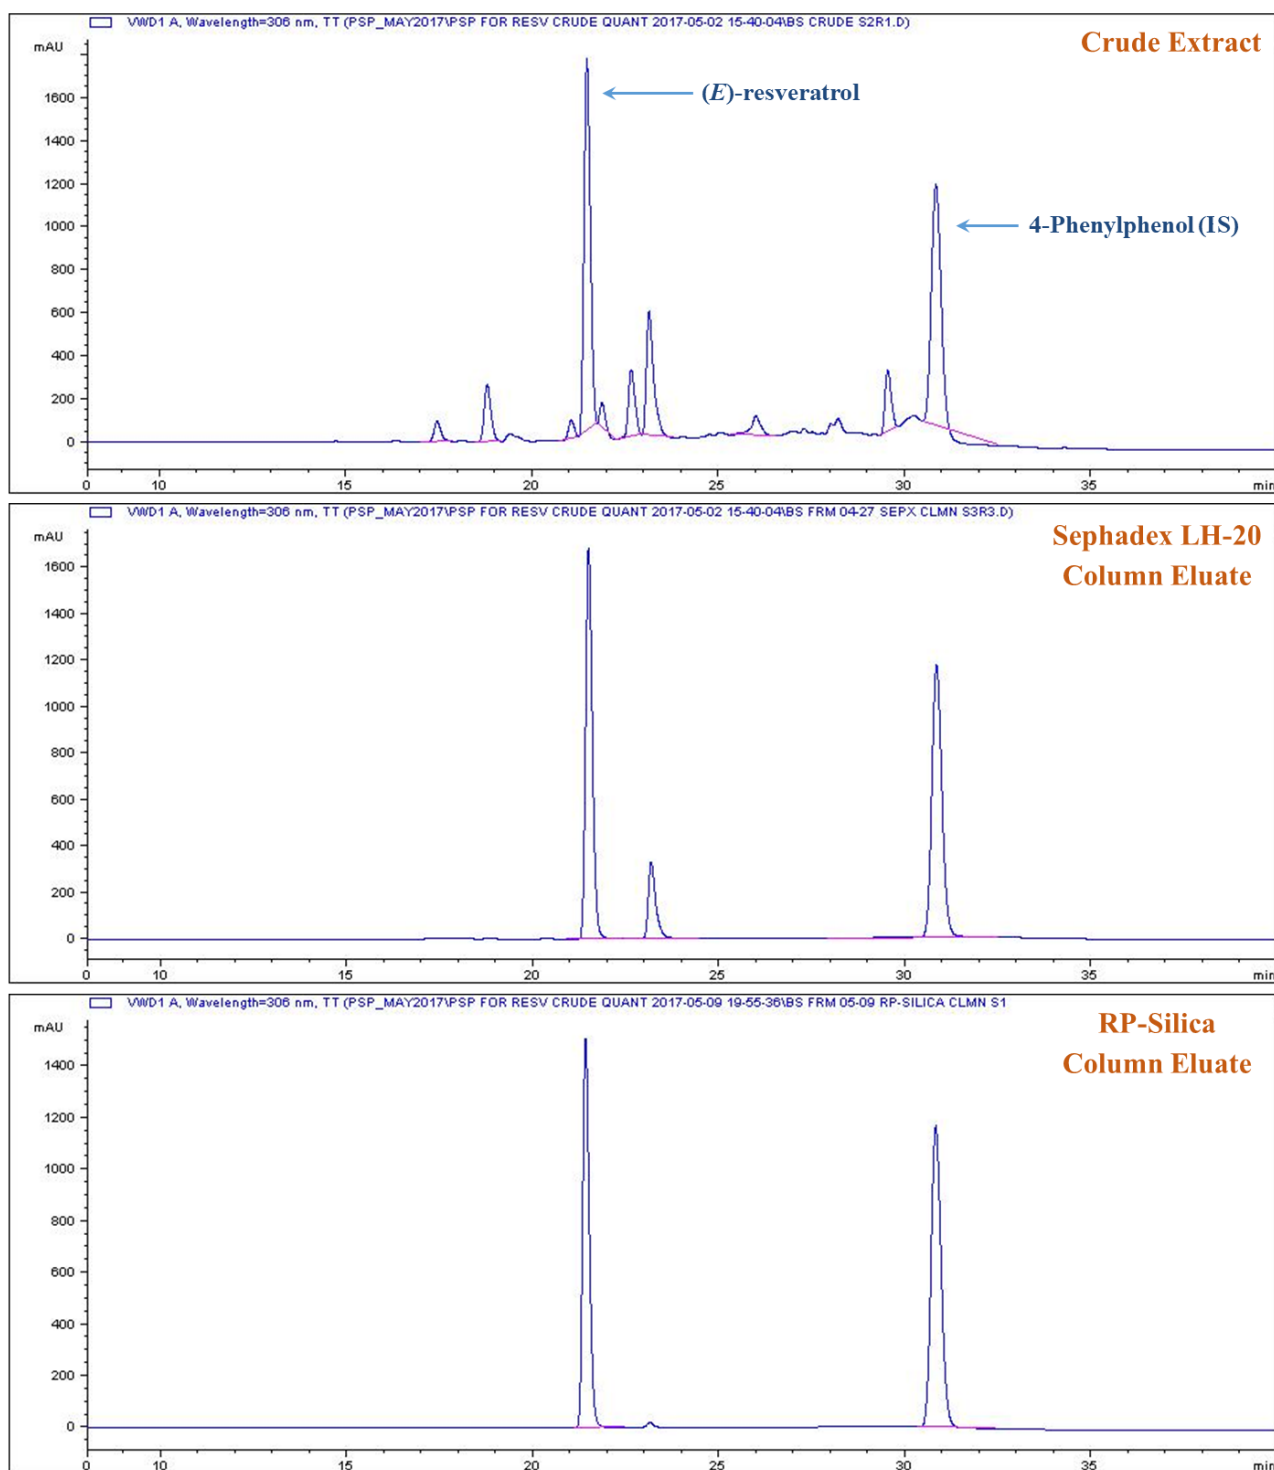

**Figure S2: HPLC chromatograms at 306 nm from the major steps of the spruce bark purification process**

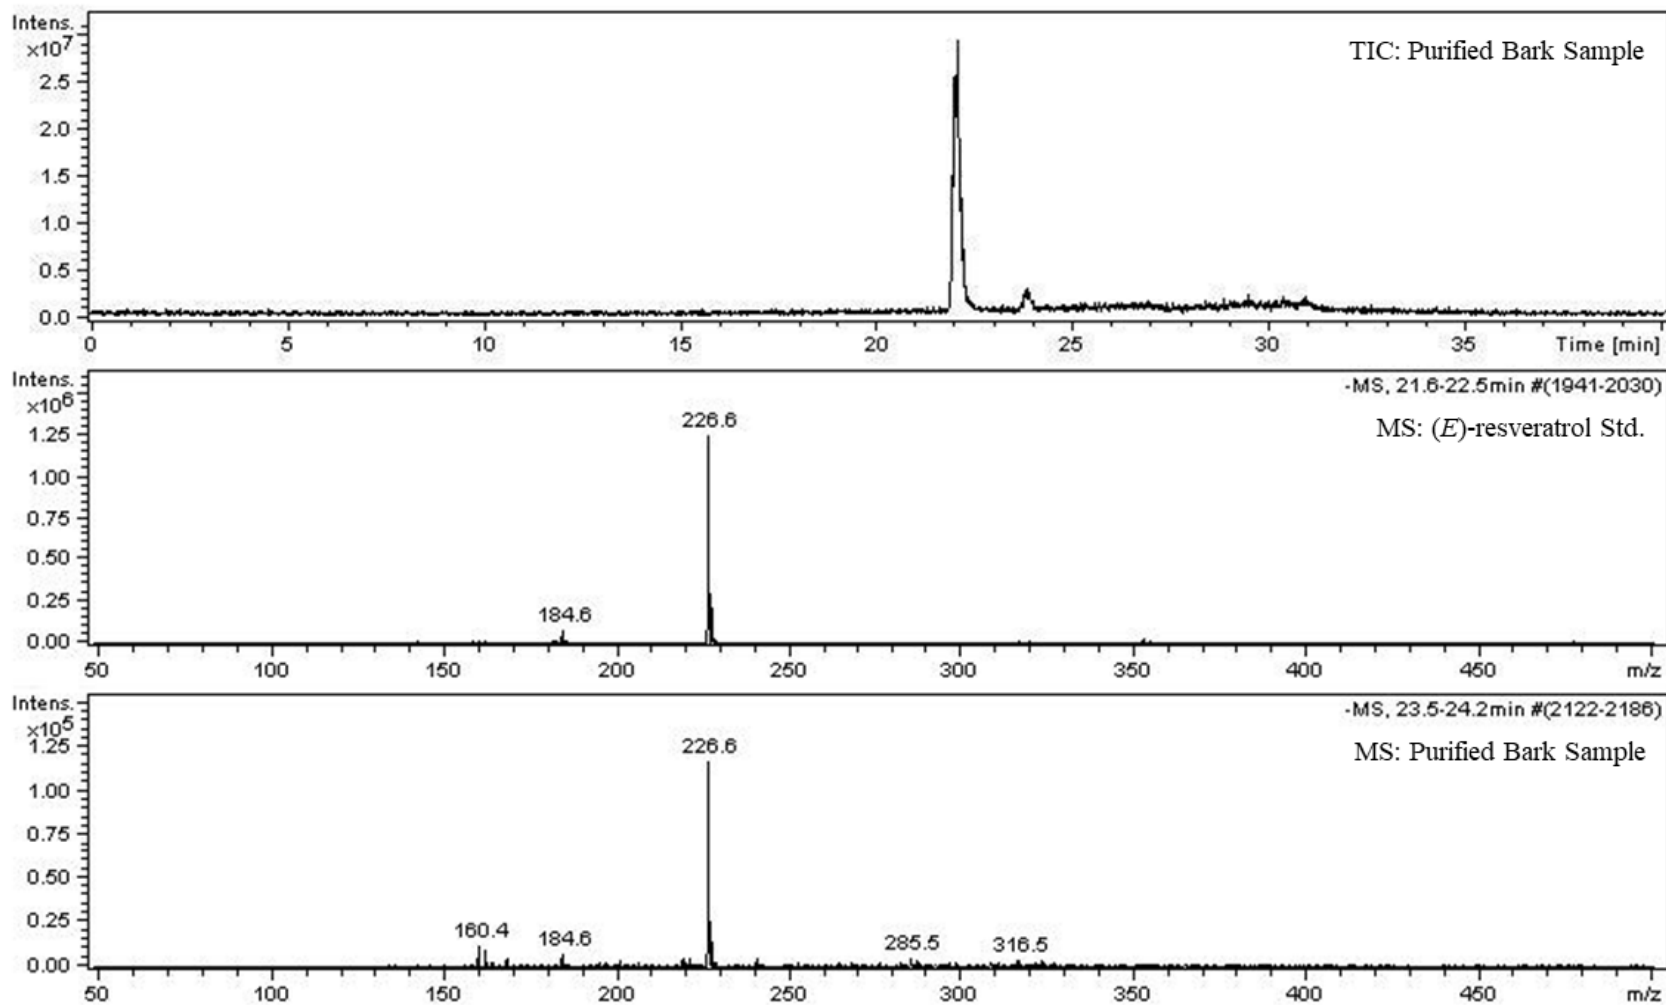

Figure S3: LCMS TIC and mass spectrum of purified BS sample in comparison to resveratrol standard
